# Supplementary material for: Blepharoconjunctivitis mimicking conjunctival tumor associated with Streptococcus intermedius sinusitis: case report and literature review
Source: Research Square preprint supplement (doi:10.21203/rs.3.rs-7487786/v1), 2025-10-08
Supplement: Supplementary file 1 [file bc020715fea72915e264412d.xlsx]

## Sheet: Sheet1
	species level
	Taxon	Cumulative Reads
	Streptococcus intermedius	51300
	Streptococcus vaginalis	379
	Streptococcus constellatus	248
	Streptococcus gordonii	164
	Streptococcus oriscaviae	145
	Streptococcus sinensis	126
	Streptococcus toyakuensis	122
	Streptococcus thermophilus	77
	Streptococcus anginosus	61
	Streptococcus dentirousetti	46
	Streptococcus troglodytidis	39
	Streptococcus sanguinis	37
	Streptococcus pneumoniae	34
	Streptococcus oralis	32
	Streptococcus marmotae	20
	Streptococcus cristatus	19
	Streptococcus danieliae	19
	Streptococcus urinalis	19
	Streptococcus himalayensis	18
	Parvimonas parva	18
	Streptococcus parasuis	17
	Streptococcus ruminantium	17
	Streptococcus ferus	14
	Streptococcus cameli	11
	Streptococcus suis	11
	Streptococcus vicugnae	11
	Anaerococcus obesiensis	10
	Campylobacter ureolyticus	10
	Proteus mirabilis	10
	Fusobacterium animalis	9
	Streptococcus macedonicus	8
	Streptococcus massiliensis	8
	Streptococcus mutans	8
	Streptococcus salivarius	8
	Streptococcus varani	8
	Streptococcus vestibularis	7
	Peptoniphilus vaginalis	7
	Streptococcus sobrinus	6
	Streptococcus tangierensis	6
	Peptococcus niger	6
	Streptococcus chosunense	5
	Streptococcus downii	5
	Streptococcus koreensis	5
	Streptococcus uberis	5
	Streptococcus ursoris	5
	Finegoldia magna	5
	Streptococcus canis	4
	Streptococcus dentiloxodontae	4
	Streptococcus hyointestinalis	4
	Streptococcus oriloxodontae	4
	Streptococcus vulneris	4
	Anaerococcus lactolyticus	4
	Peptoniphilus coxii	4
	Streptococcus dentasini	3
	Streptococcus gallinaceus	3
	Streptococcus pacificus	3
	Streptococcus panodentis	3
	Streptococcus respiraculi	3
	Peptoniphilus grossensis	3
	Peptoniphilus lacrimalis	3
	Streptococcus alactolyticus	2
	Streptococcus caballi	2
	Streptococcus caledonicus	2
	Streptococcus downei	2
	Streptococcus equi	2
	Streptococcus halotolerans	2
	Streptococcus lutetiensis	2
	Streptococcus minor	2
	Streptococcus moroccensis	2
	Streptococcus oricebi	2
	Streptococcus porcorum	2
	Streptococcus ratti	2
	Lactococcus paracarnosus	2
	Aerococcus urinae	2
	Enterococcus columbae	2
	Streptococcus cuniculipharyngis	1
	Streptococcus loxodontisalivarius	1
	Streptococcus macacae	1
	Streptococcus ovis	1
	Streptococcus pantholopis	1
	Streptococcus parasanguinis	1
	Streptococcus plurextorum	1
	Streptococcus pseudopneumoniae	1
	Streptococcus rubneri	1
	Streptococcus symci	1
	Streptococcus zalophi	1
	Lactococcus insecticola	1
	Carnobacterium gallinarum	1
	Enterococcus pseudoavium	1
	Melissococcus plutonius	1
	Levilactobacillus paucivorans	1
	Liquorilactobacillus uvarum	1
	Neobacillus paridis	1
	Oceanobacillus jeddahense	1
	Exiguobacterium undae	1
	Staphylococcus epidermidis	1
	Anaerococcus vaginalis	1
	Ezakiella coagulans	1
	Corynebacterium amycolatum	1
	Neisseria cinerea	1
	Snodgrassella gandavensis	1
